# Supplementary material
Source: publisher figshare collection journal article supplement (https://acs.figshare.com/ndownloader/files/4345339)
Supplement: Supplementary file 1 [file 4345339]

# Syntheses, Crystal and electronic Structures, and Characterizations of Quaternary Antiferromagnetic Sulfides: Ba<sub>2</sub>MFeS<sub>5</sub> (M= Sb, Bi)

*Lei Geng,<sup>a,b</sup> Wen-Dan Cheng,<sup>\*a</sup> Hao Zhang,<sup>a</sup> Chen-Sheng Lin,<sup>a</sup> Wei-Long Zhang,<sup>a</sup> Ye-Yu Li,<sup>a,b</sup> and  
Zhang-Zhen He<sup>a</sup>*

<sup>a</sup> State Key Laboratory of Structural Chemistry, Fujian Institute of Research on the Structure of Matter,  
Chinese Academy of Sciences, Fuzhou 350002, P. R. China

<sup>b</sup> Graduate School of the Chinese Academy of Sciences, Beijing, 100039, P. R. China

E-mail: cwd@fjirsm.ac.cn

## Supporting Information

**Table S1.** The definitions and related state energies (eV) of the special k points for Ba<sub>2</sub>SbFeS<sub>5</sub> crystal.

| k point          | H-VB <sup>a</sup> | L-CB <sup>b</sup> |
|------------------|-------------------|-------------------|
| Γ(0.0, 0.0, 0.0) | −0.00641          | 1.00872           |
| F(0.0, 0.5, 0.0) | −0.0804           | 1.01268           |
| Q(0.0, 0.5, 0.5) | −0.10628          | 1.00526           |
| Z(0.0, 0.0, 0.5) | −0.05219          | 0.99074           |
| X(0.5, 0.0, 0.5) | −0.01906          | 1.1073            |

<sup>a</sup>H-VB, the highest valence band; <sup>b</sup>L-CB, the lowest conduction band.

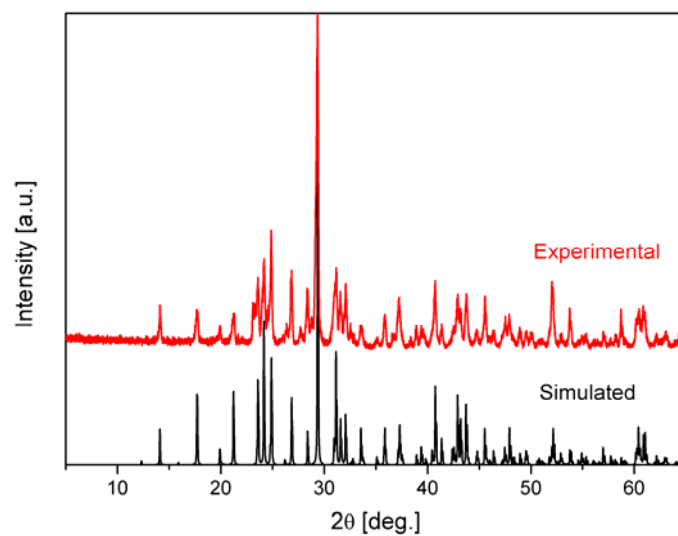

(a)

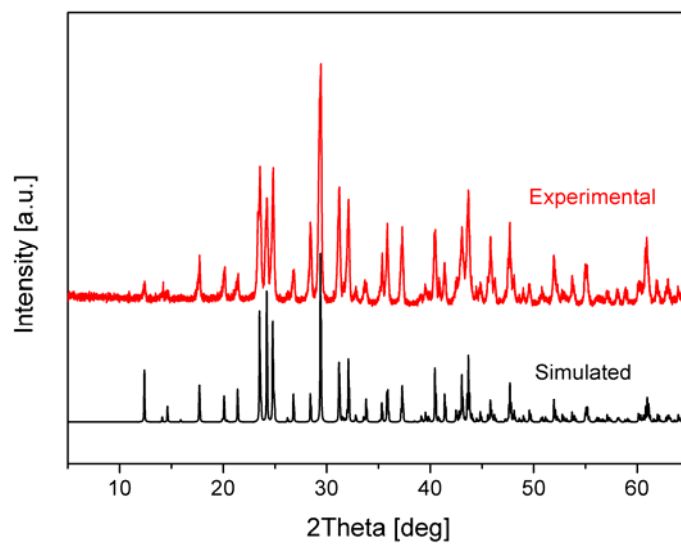

(b)

**Figure S1.** Experimented and simulated X-ray diffraction patterns for polycrystalline  $\text{Ba}_2\text{SbFeS}_5$  (a) and  $\text{Ba}_2\text{BiFeS}_5$  (b). (The radiation wavelength of the X-ray is  $\lambda = 1.5418 \text{ \AA}$ .)

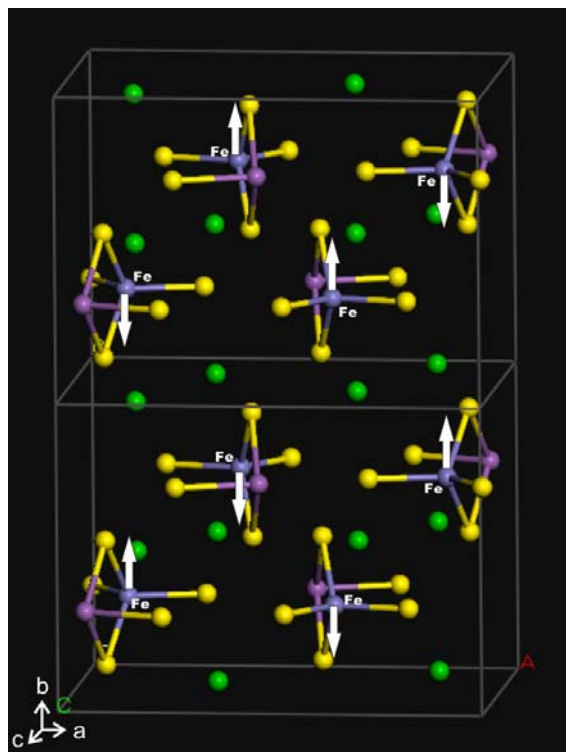

**Figure S2.** The spin polarization configurations adopted in the band structure calculations for compound  $\text{Ba}_2\text{BiFeS}_5$ .

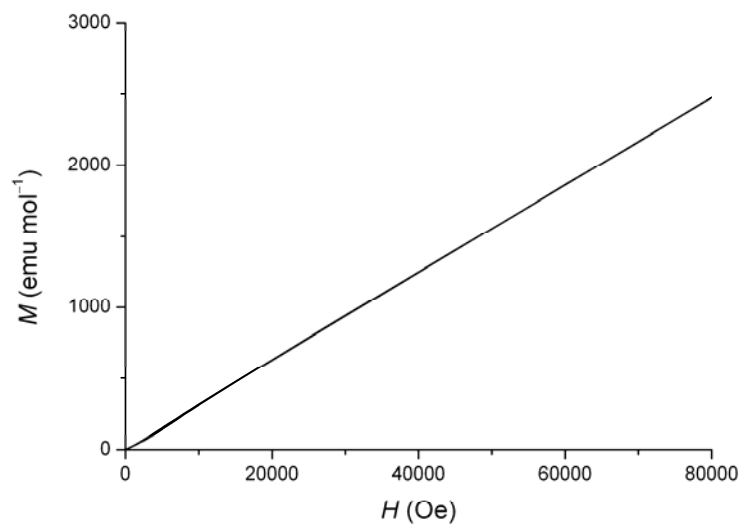

**Figure 3.** Magnetization ( $M$ ) as a function of magnetic field ( $H$ ) for compound  $\text{Ba}_2\text{BiFeS}_5$  at  $T = 2$  K.
